# Supplementary material for: Transition of trigonal-bipyramidal to square-planar geometries by oxidation of a coordinated tripodal polyphosphine in Pd(ii) and Pt(ii) complexes
Source: Royal Society of Chemistry journal article supplement (doi:10.1039/c1ra00897h), 2011-12-16
Supplement: c1ra00897h.pdf [file c1ra00897h.pdf]

## Equation Supplementary Information

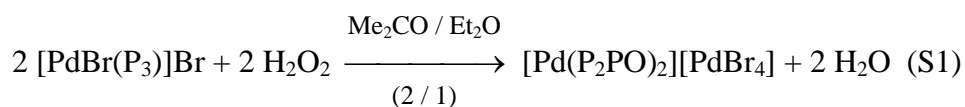

## Scheme and Figure Captions. Supplementary Information

**Scheme S1.** Proposed equilibria involving five- and four-coordinate species for oxidations of **1-6** with  $\text{H}_2\text{O}_2$ .

**Scheme S2.** Proposed equilibria for reactions of **3** and **6** in  $\text{DMSO-d}_6$  with GSH in  $\text{D}_2\text{O}$ .

**Scheme S3.** Trigonal-bipyramidal and/or square-planar thiolates obtained from  $[\text{PtI}(\text{NP}_3)]\text{I}$  in  $\text{DMSO-d}_6$  and  $[\text{PdCl}(\text{NP}_3)]\text{Cl}$  in  $\text{CD}_3\text{OD}$  by addition of GSH in  $\text{D}_2\text{O}$ .

**Figure S1.** ORTEP diagram for **13\***. 50% probability of thermal ellipsoid drawn and solvents removed for clarity.

**Figure S2.**  $^{31}\text{P}\{^1\text{H}\}$ NMR Spectra in  $\text{CDCl}_3$  (r.t.) for **1** (top), **2** (middle) and **3** (bottom) and their products of reaction with 12 molar equivalents of  $\text{H}_2\text{O}_2$ .

**Figure S3.**  $^{195}\text{Pt}\{^1\text{H}\}$ NMR Spectrum (r.t.) of **10** in  $\text{DMSO-d}_6$

**Figure S4.** Titration (r.t.) of **10**· $2\text{H}_2\text{O}$  (bottom) with  $\text{CuCl}$  in  $\text{CDCl}_3$  followed by  $^{31}\text{P}\{^1\text{H}\}$ NMR

**Figure S5.**  $^{31}\text{P}\{^1\text{H}\}$ NMR spectra for titration of **4** with 1-3 (bottom - top) equivalents of GSH in  $\text{DMSO-d}_6 + \text{D}_2\text{O}$

**Figure S6.**  $^{31}\text{P}\{^1\text{H}\}$ NMR Spectrum (r.t.) for **1+3 eq.GSH** in DMSO- $\text{d}_6$ +D $_2$ O (pH= 4.0)

**Figure S7.**  $^1\text{H}$ NMR Spectra (r.t.) in DMSO- $\text{d}_6$ +D $_2$ O for : **1+3eq. GSH** (top) and **4+3eq.GSH** (bottom)

**Figure S8.**  $^{31}\text{P}\{^1\text{H}\}$ NMR spectra (r.t.) for titration of **10** with 1-3 (bottom - top) equivalents of GSH in DMSO- $\text{d}_6$  + D $_2$ O

**Figure S9.**  $^{31}\text{P}\{^1\text{H}\}$ NMR spectra (r.t.) for : **3** in DMSO- $\text{d}_6$  (bottom) and the reactions with 1 (middle) and 2 (top) equivalents of GSH

**Figure S10.** Titration (r.t.) followed by  $^{31}\text{P}\{^1\text{H}\}$ NMR of  $[\text{PdCl}(\text{NP}_3)]\text{Cl}$  with GSH in CD $_3$ OD/D $_2$ O giving  $[\text{Pd}(\text{SG})(\text{NP}_3)]\text{Cl}$  and  $[\text{Pd}(\text{SG})(\text{NP}_2\text{PO})]\text{Cl}$

### Scheme S1

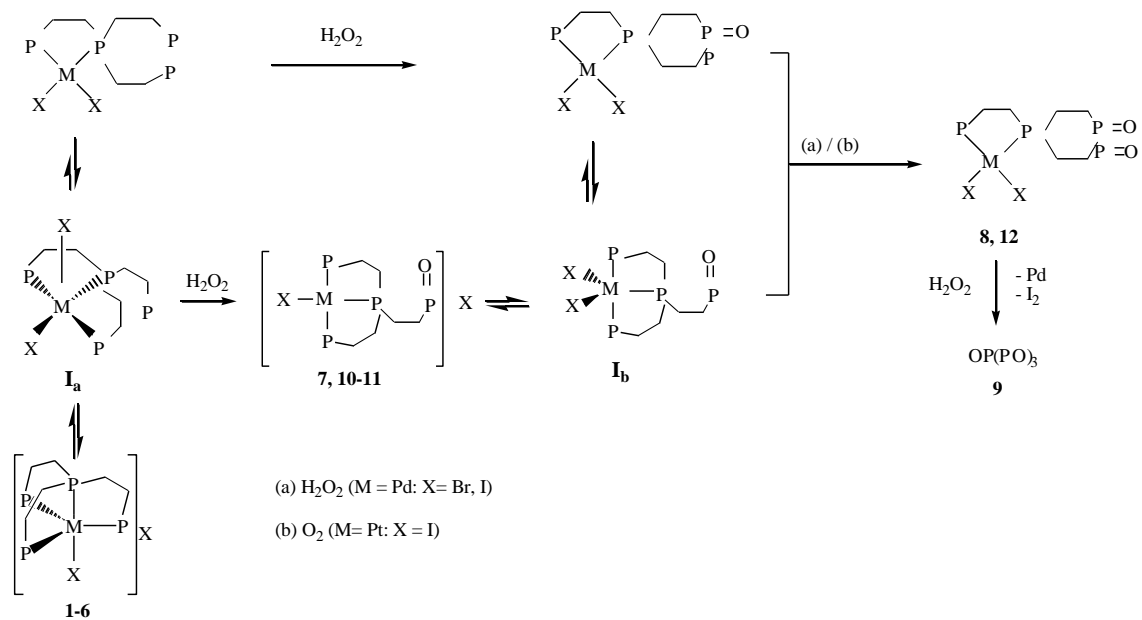

**Scheme S2**

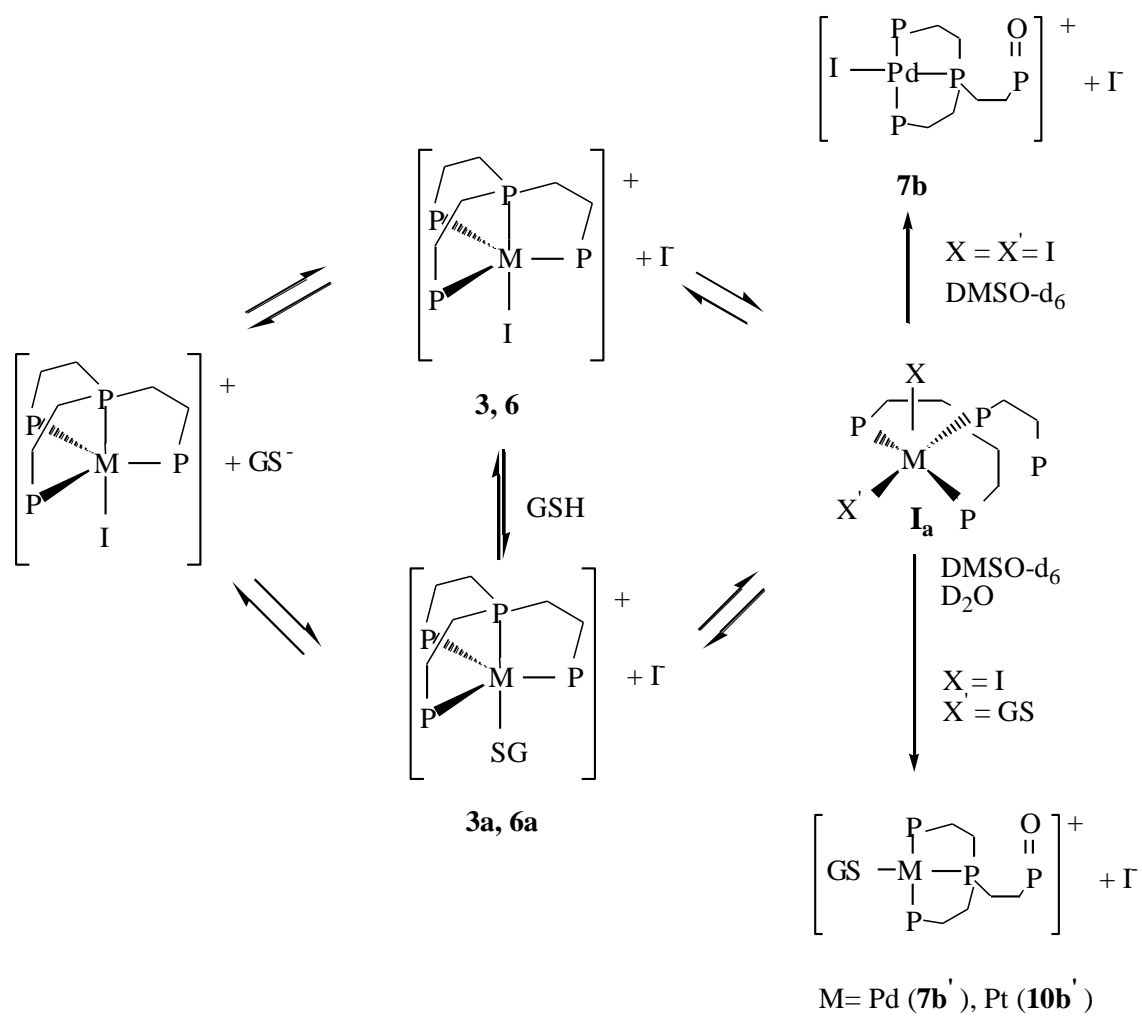

### Scheme S3

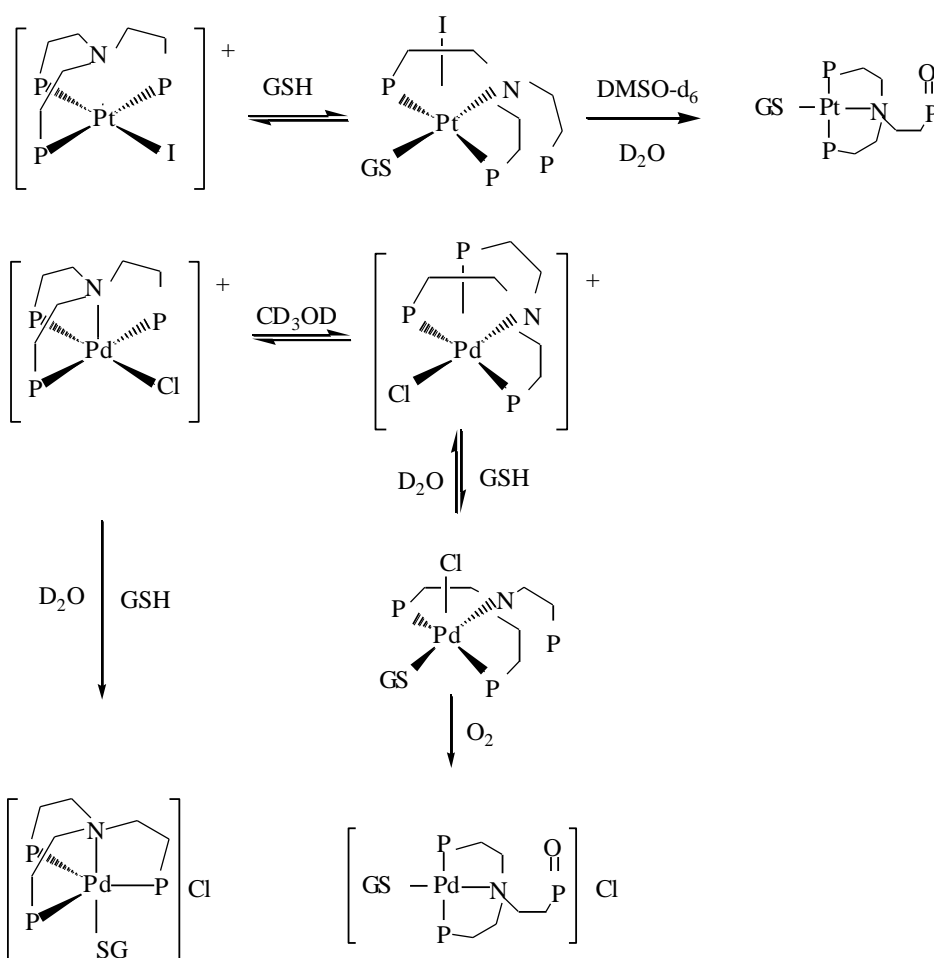

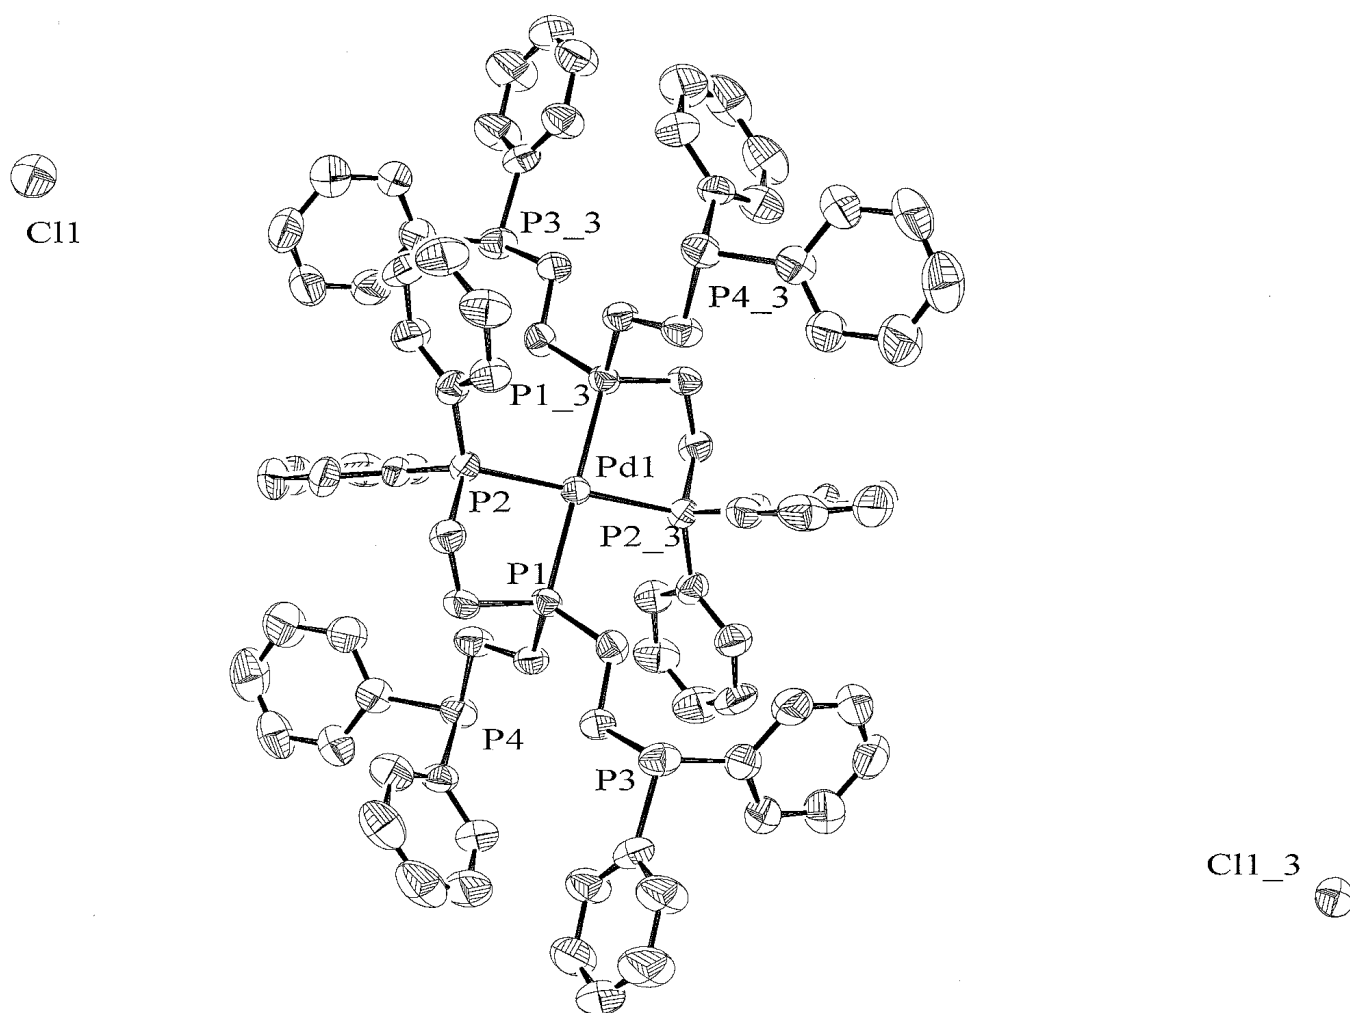

Figure S1

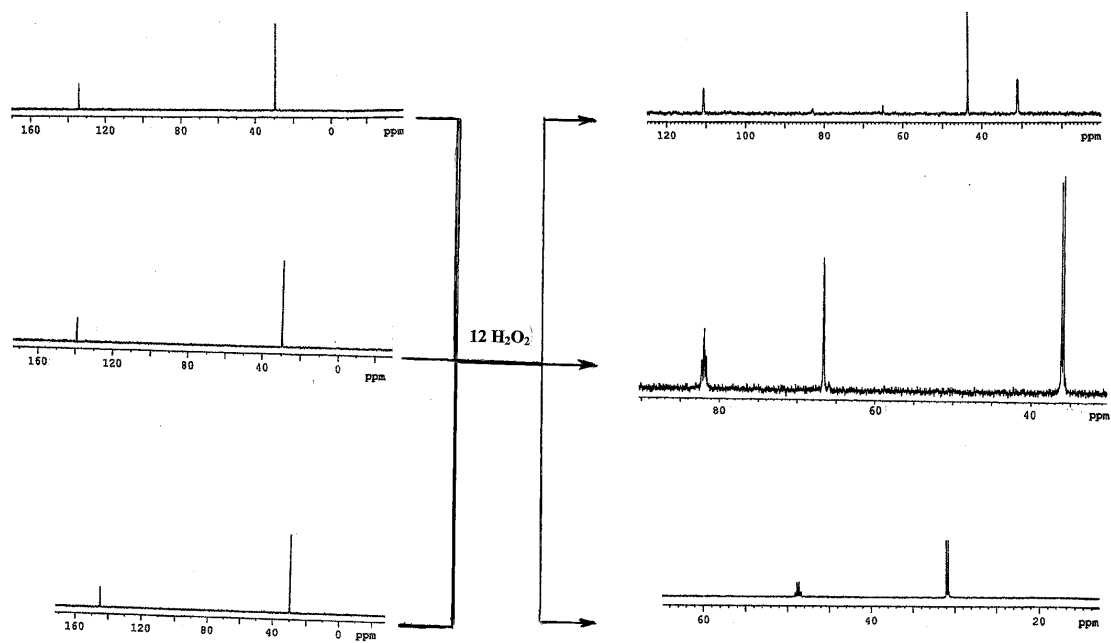

Figure S2

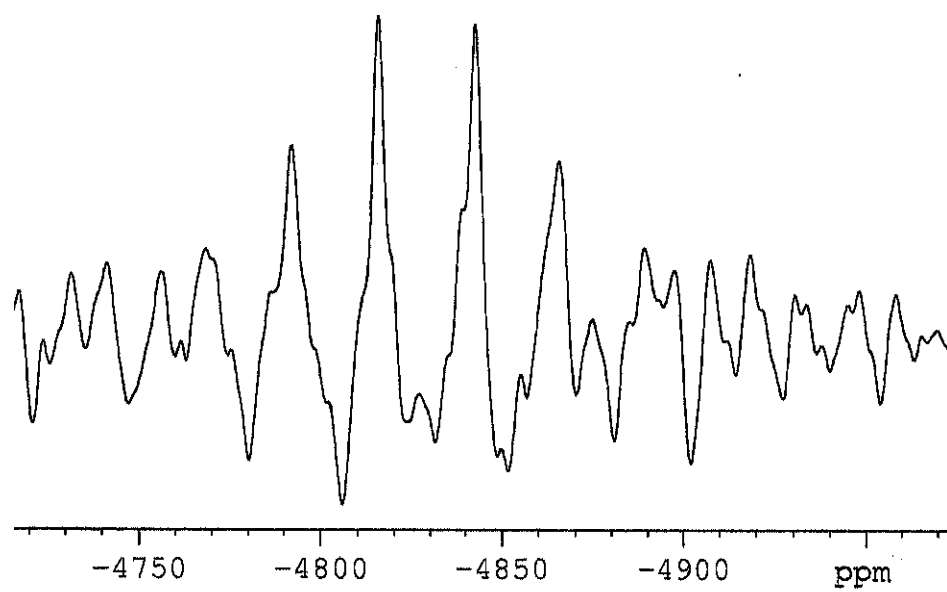

**Figure S3**



+2eq CuCl

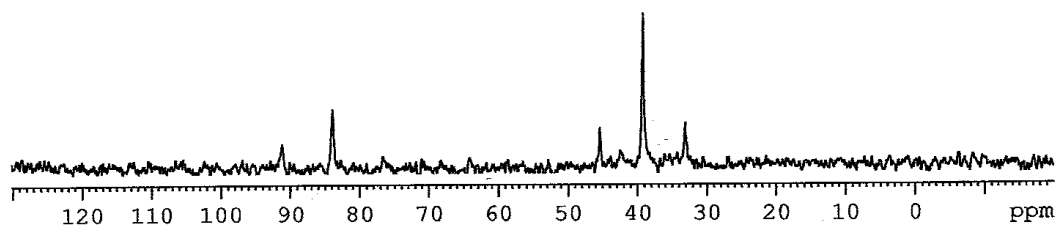

+1eq CuCl

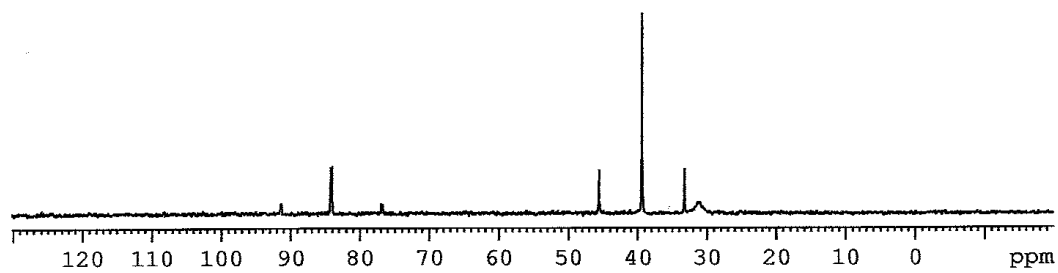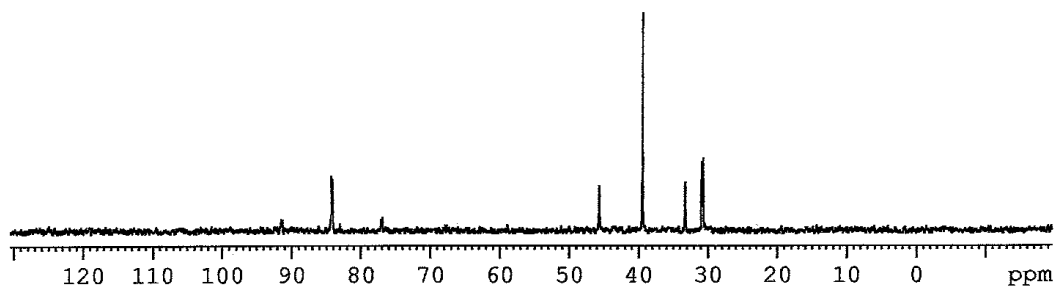

**Figure S4**

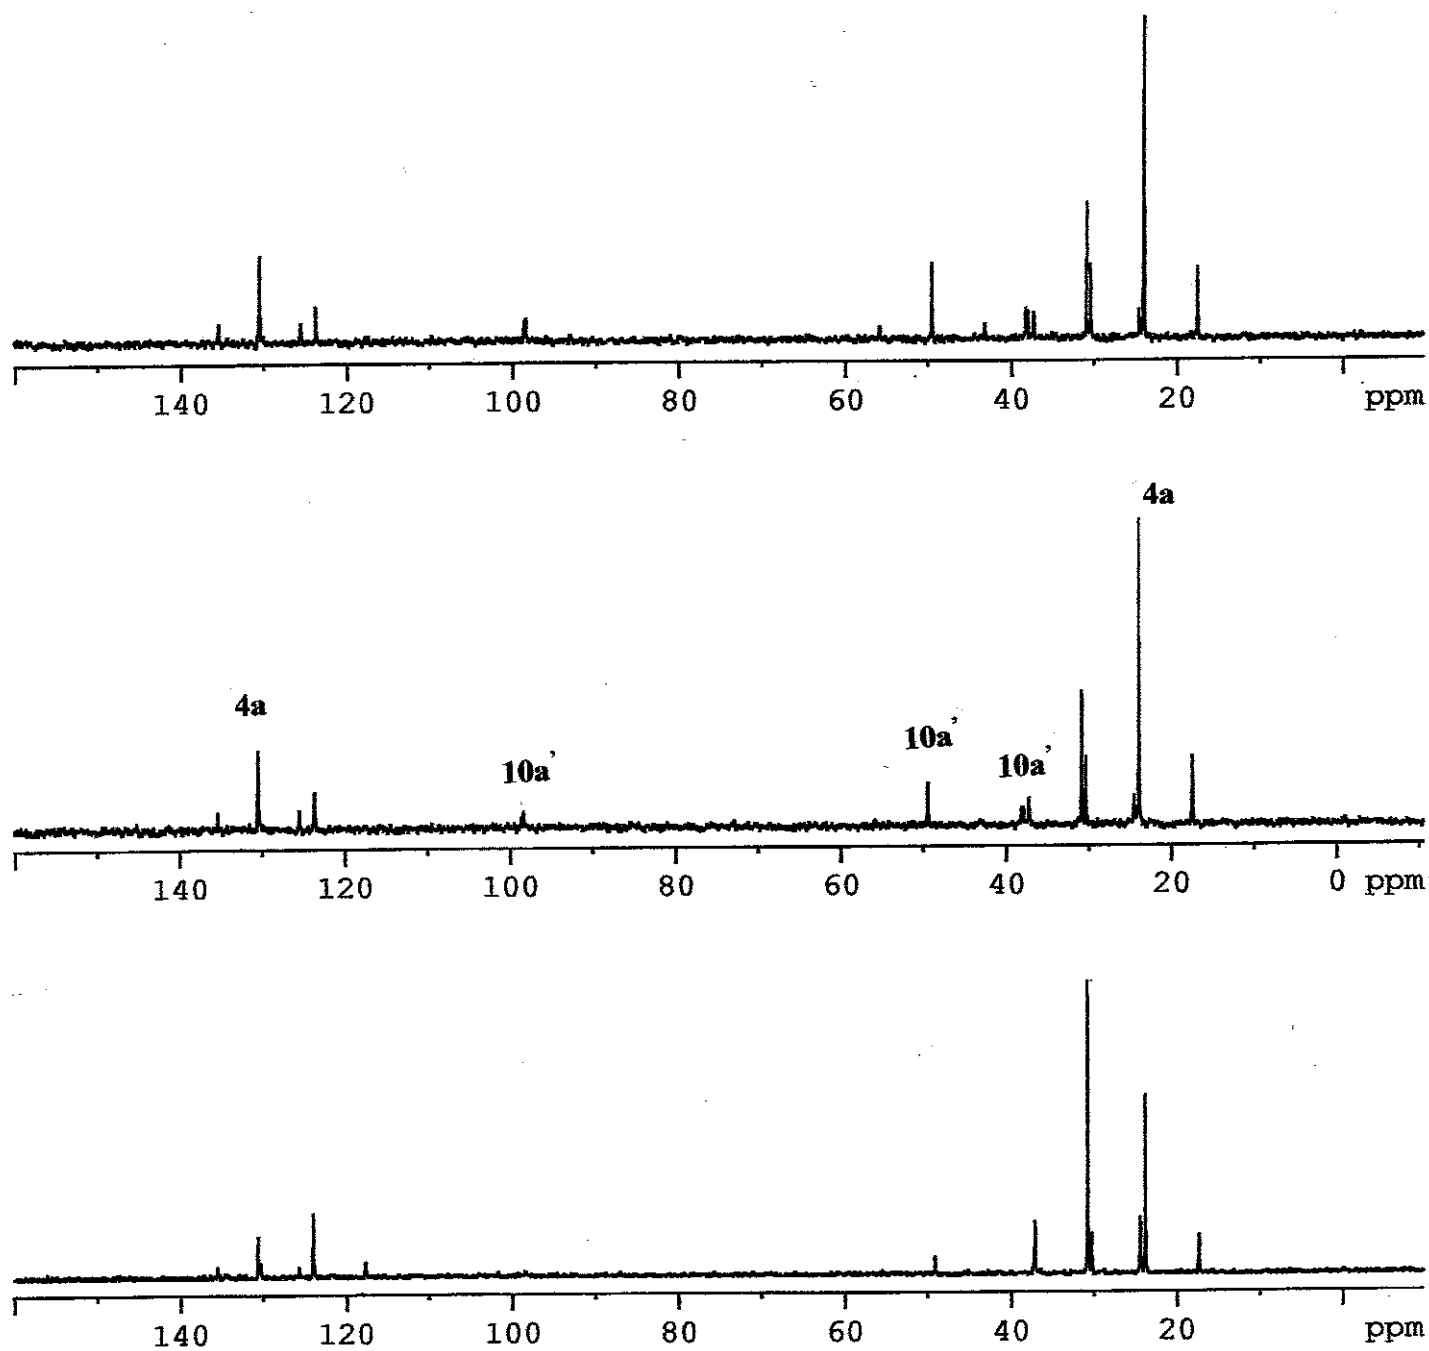

Figure S5

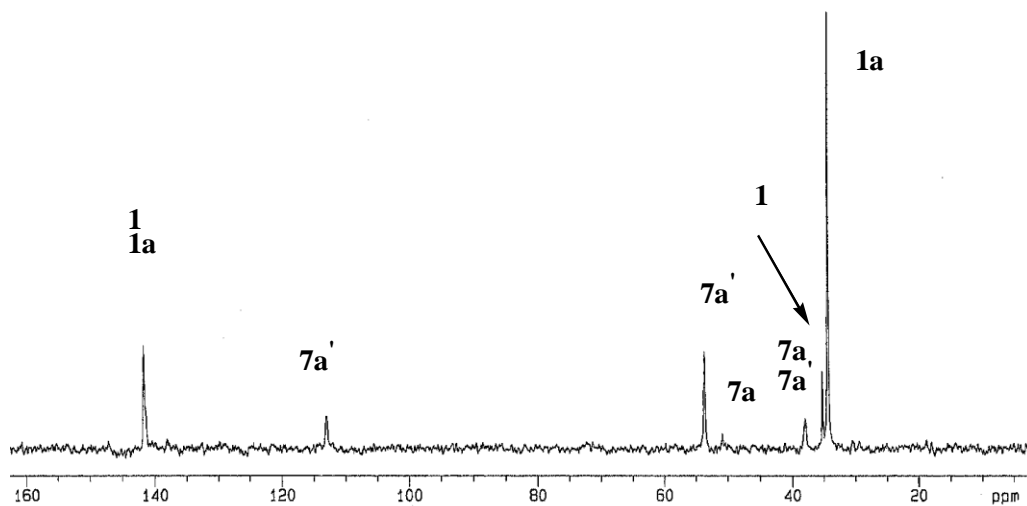

**Figure S6**

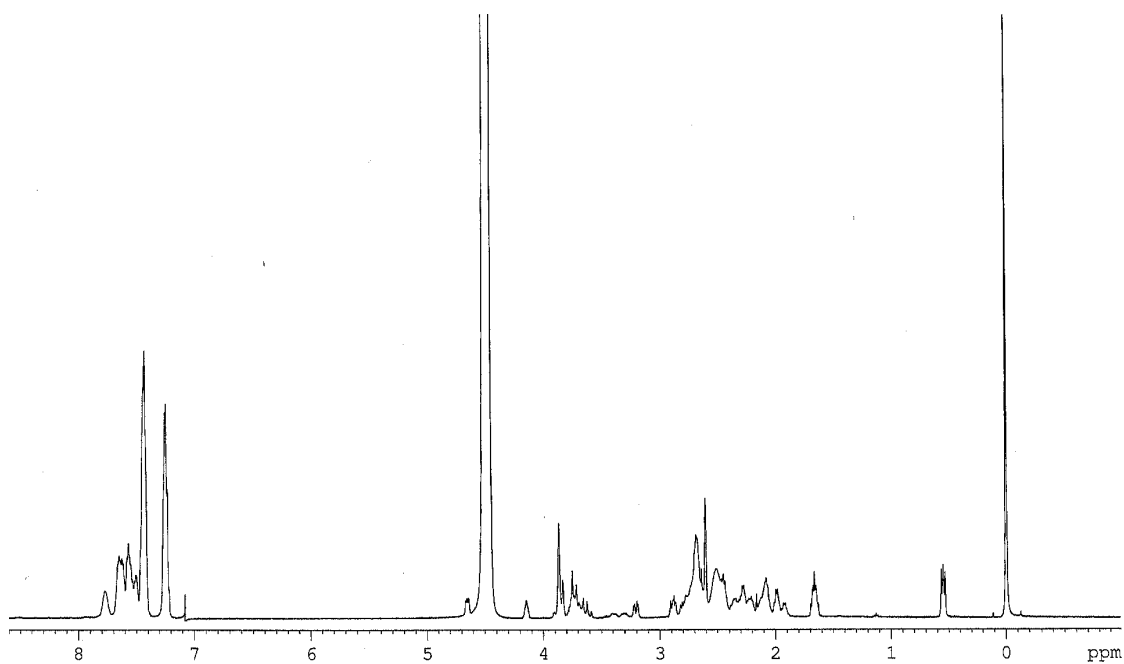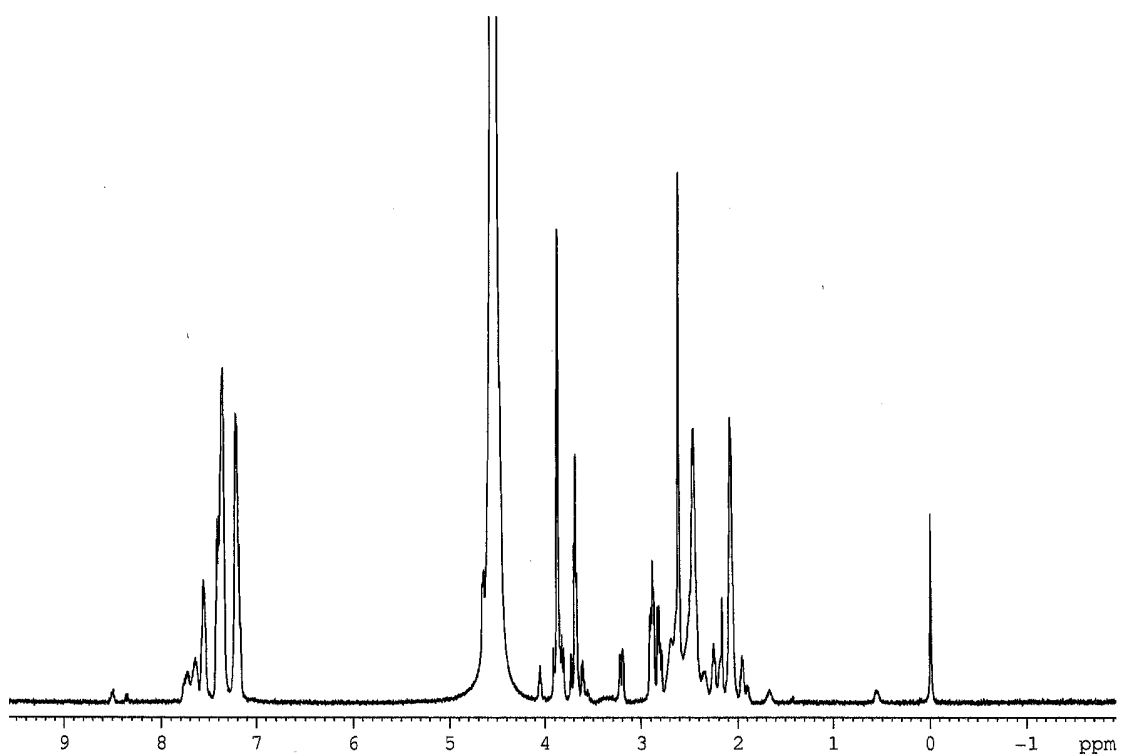

**Figure S7**

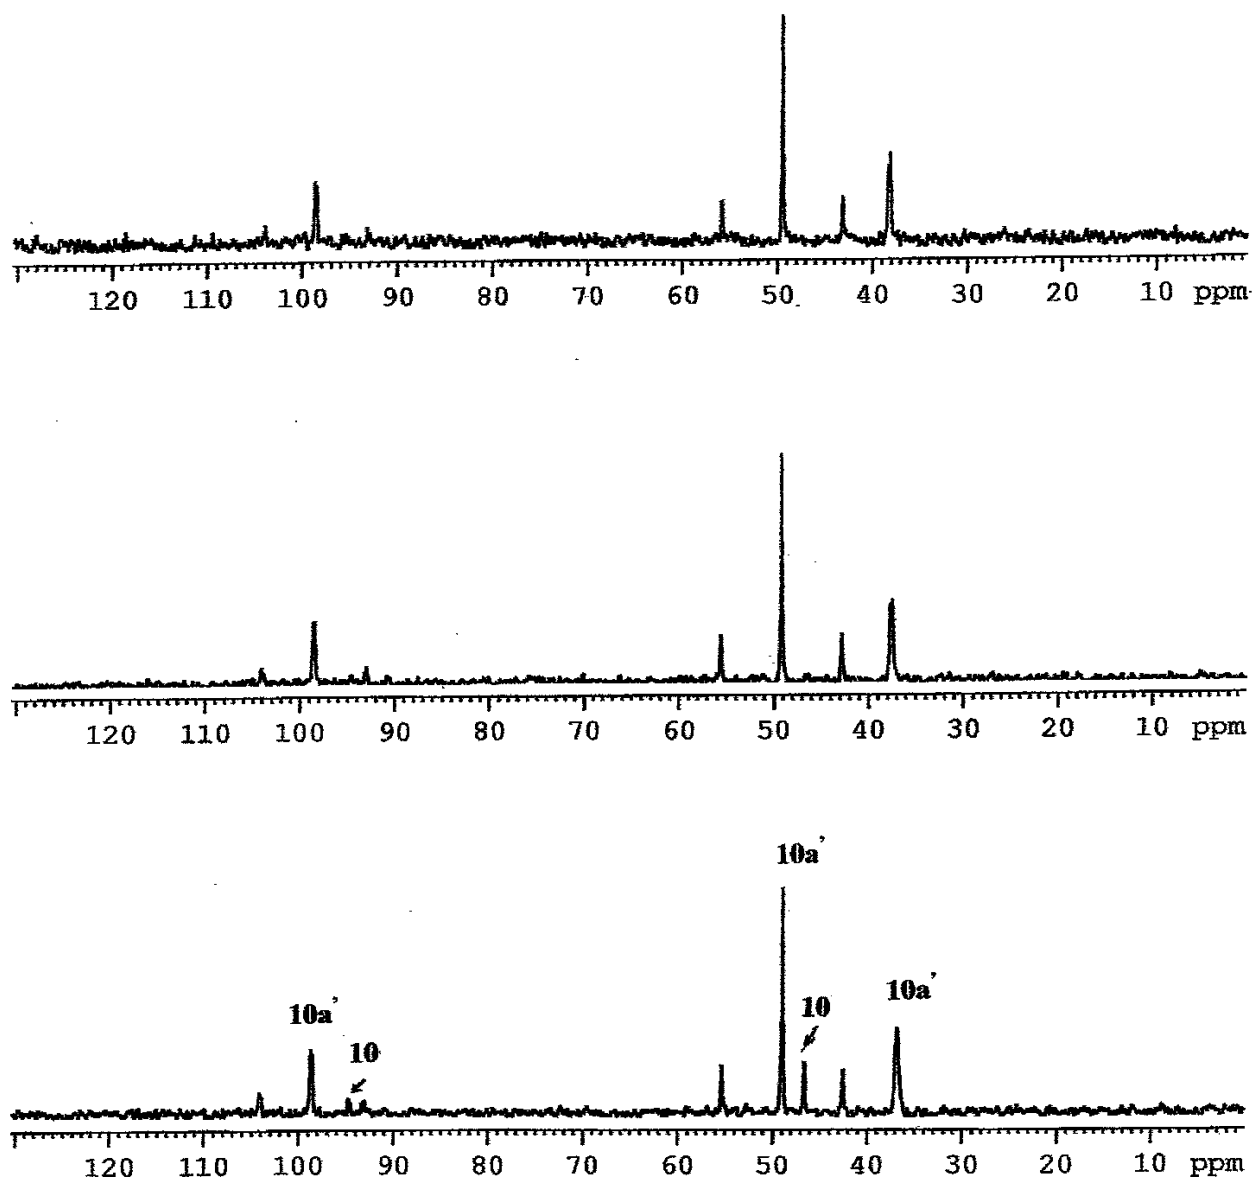

Figure S8

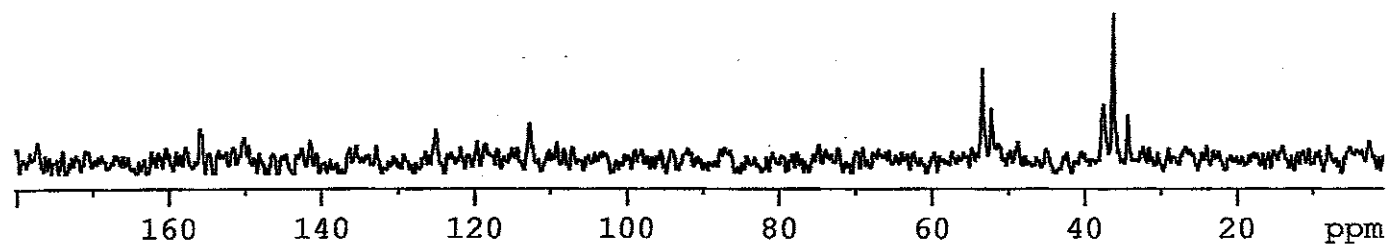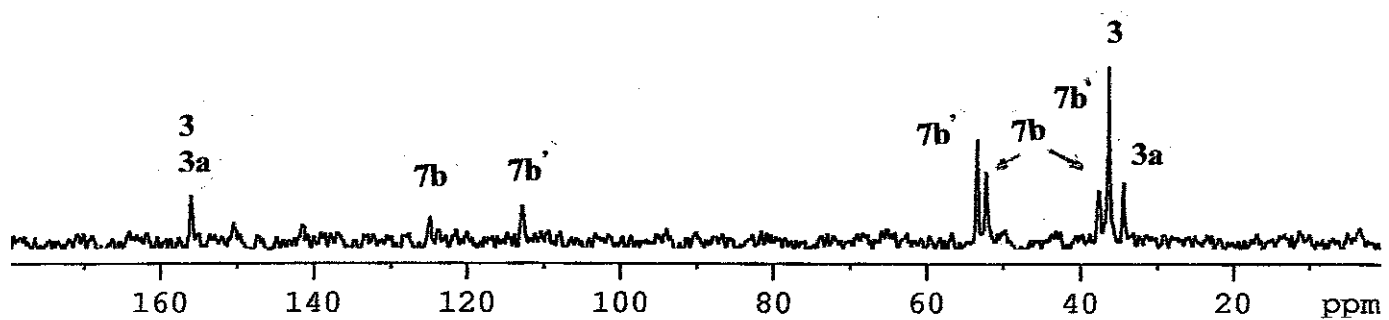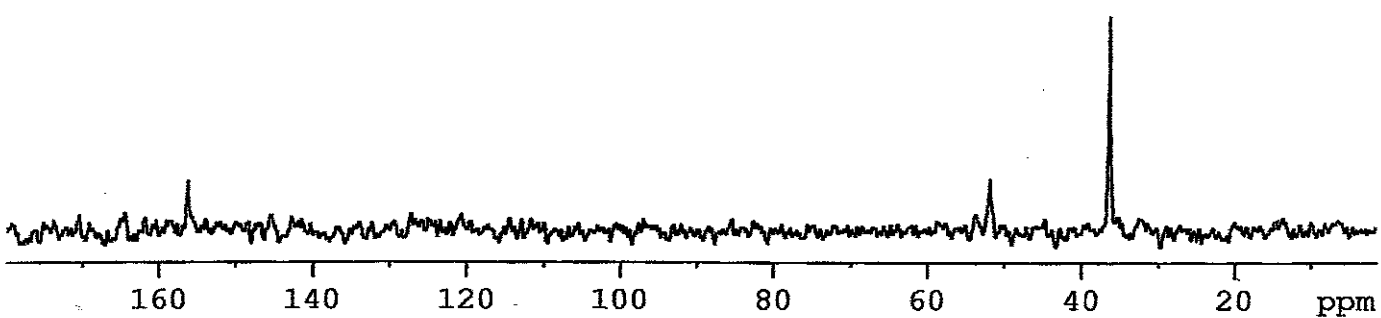

Figure S9

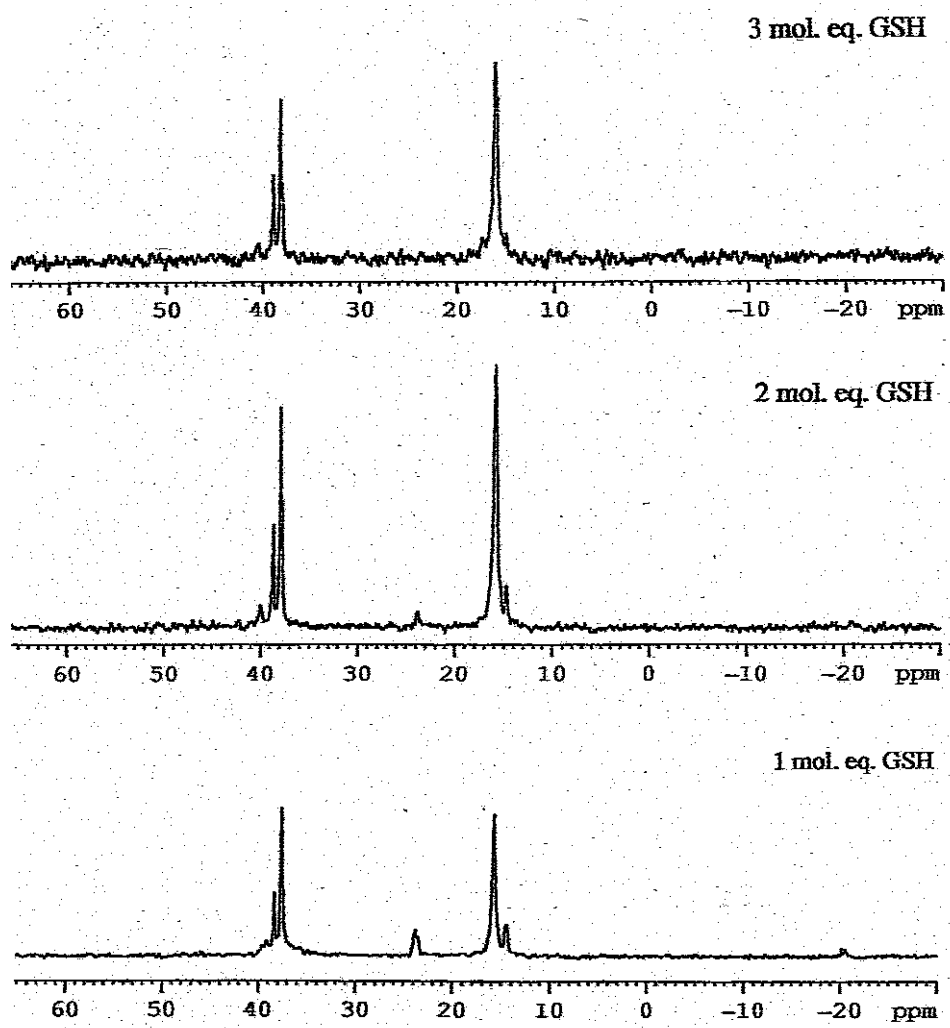

Figure S10
